# Supplementary material for: Pharmacodynamic structure of deer antler base protein and its mammary gland hyperplasia inhibition mechanism by mediating Raf-1/MEK/ERK signaling pathway activation
Source: Royal Society of Chemistry journal article supplement (doi:10.1039/d2fo03568e), 2023-01-01
Supplement: d2fo03568e1.xlsx [file d2fo03568e1.xlsx]

## Sheet: Peptides 
Sequence	Length	Missed cleavages	Mass	Start position	End position	Unique (Groups)	Charges	PEP	Score	Intensity
GSGGGSSGGSIGGR	14	0	1091.5	596	609	yes	2	1.5163e-170	195.51	470300000
AEAESLYQSK	10	0	1124.54	362	371	yes	2	4.1453e-25	135.79	712910000
SKAEAESLYQSK	12	1	1339.66	360	371	yes	2;3	0.00012133	103.08	4510700000
SGGGFSSGSAGIINYQR	17	0	1656.79	13	29	yes	2	3.9447e-06	62.89	271210000
LDSELKNMQDMVEDYR	16	1	1984.89	247	262	yes	3	0.0023325	43.791	11825000
TLLEGEESR	9	0	1032.51	479	487	no	2	2.0979e-14	147.29	586160000
AQYEDIAQK	9	0	1064.51	351	359	no	2	4.1092e-14	127.46	922930000
FLEQQNQVLQTK	12	0	1474.78	195	206	no	2;3	3.2963e-17	125.48	6338900000
GENALKDAK	9	1	944.493	428	436	no	2	5.6583e-05	111.46	132290000
LDSELK	6	0	703.375	247	252	no	2	0.0029423	103.28	2709500000
LRSEIDNVK	9	1	1072.59	403	411	no	2;3	0.0020778	100.98	235810000
DYQELMNTK	9	0	1140.51	459	467	no	2	0.0017753	100.09	247350000
RVDQLK	6	1	757.445	236	241	no	2	0.0063768	98.415	876920000
SLNNQFASFIDK	12	0	1382.68	181	192	no	2	0.00036921	94.616	1823500000
LNDLEDALQQAK	12	0	1356.69	439	450	no	2	0.00042117	93.098	866680000
WELLQQVDTSTR	12	0	1474.74	207	218	no	2;3	3.0799e-05	84.17	289870000
SEIDNVKK	8	1	931.497	405	412	no	2	0.0058288	77.058	326960000
DVDGAYMTK	9	0	998.438	285	293	no	2	0.017192	72.23	69125000
KDVDGAYMTK	10	1	1126.53	284	293	no	2	0.0058202	67.726	72990000
NMQDMVEDYR	10	0	1299.52	253	262	no	2	0.0067989	62.823	410830000
LRSEIDNVKK	10	2	1200.68	403	412	no	3;4	0.0058874	50.452	1463400000
QISNLQQSISDAEQR	15	0	1715.84	413	427	no	3	0.0024786	47.639	41631000
KQISNLQQSISDAEQR	16	1	1843.94	412	427	no	3	0.0035573	45.14	12124000
LLRDYQELMNTK	12	1	1522.78	456	467	no	3	0.016102	21.06	0
