# Supplementary material for: Pharmacodynamic structure of deer antler base protein and its mammary gland hyperplasia inhibition mechanism by mediating Raf-1/MEK/ERK signaling pathway activation
Source: Royal Society of Chemistry journal article supplement (doi:10.1039/d2fo03568e), 2023-01-01
Supplement: d2fo03568e2.pdf [file d2fo03568e2.pdf]

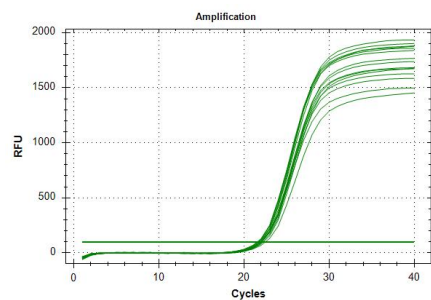

**cAMP Amplification plot**

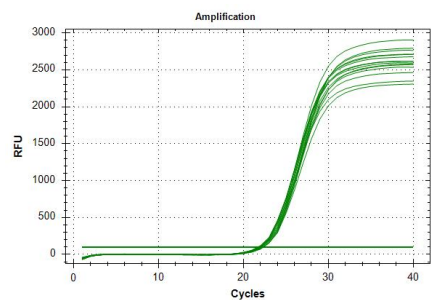

**PKA Amplification plot**

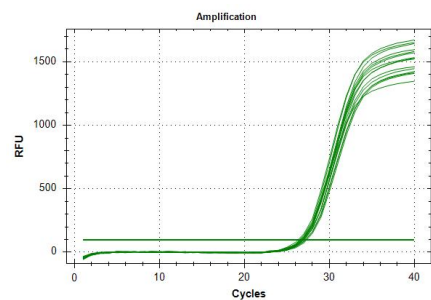

**Raf-1 Amplification plot**

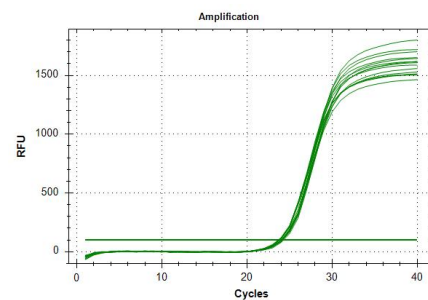

**ERK1 Amplification plot**

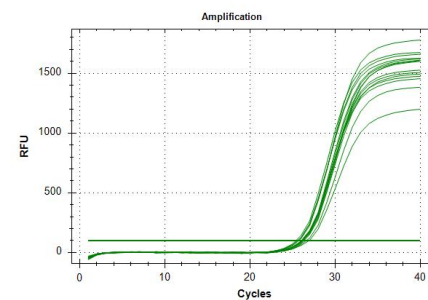

**ERK2 Amplification plot**

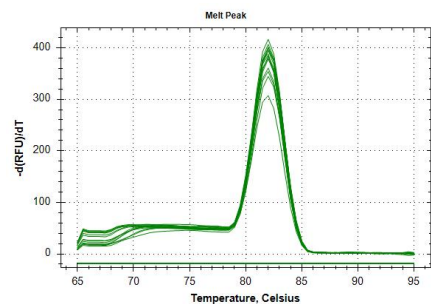

**cAMP Melting curve**

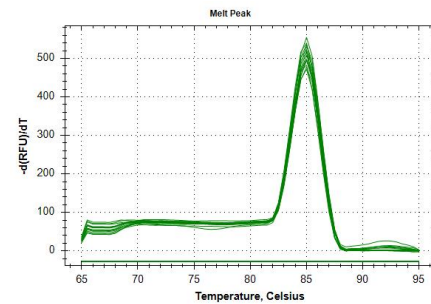

**PKA Melting curve**

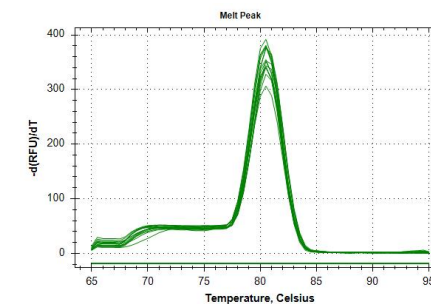

**Raf-1 Melting curve**

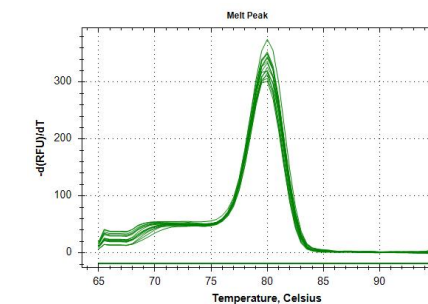

**ERK1 Melting curve**

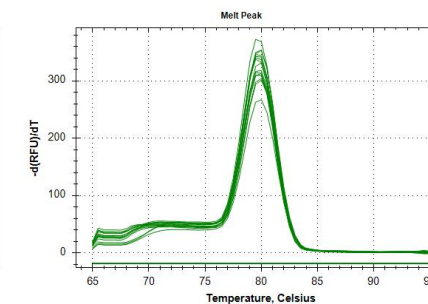

**ERK2 Melting curve**
