# Supplementary figures and images for: Pharmacodynamic structure of deer antler base protein and its mammary gland hyperplasia inhibition mechanism by mediating Raf-1/MEK/ERK signaling pathway activation
Source: Royal Society of Chemistry journal article supplement (doi:10.1039/d2fo03568e), 2023-01-01

# cAMP

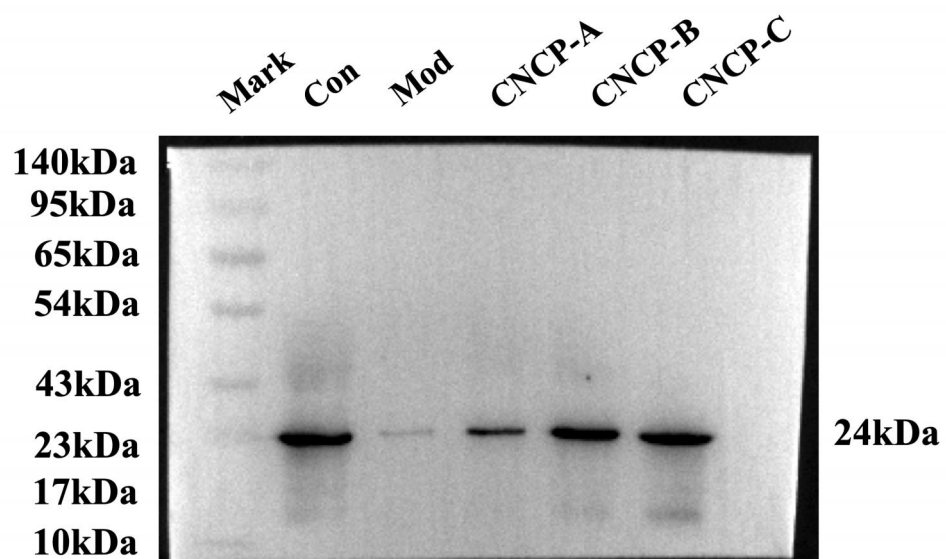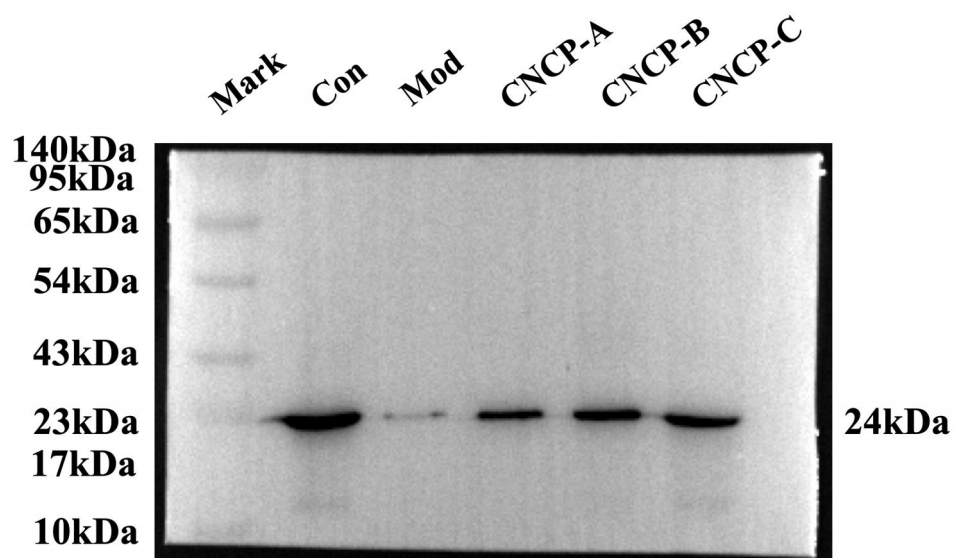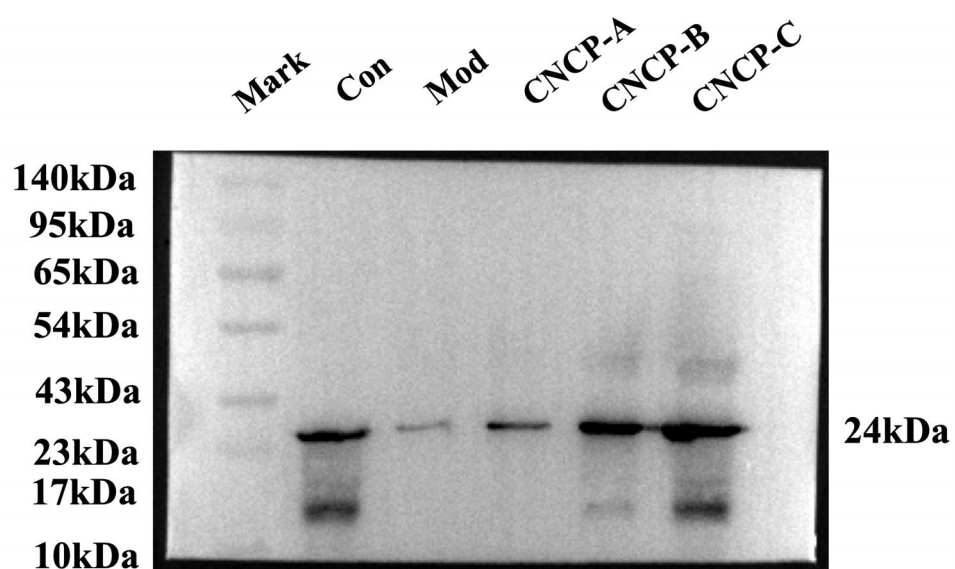

# PKA

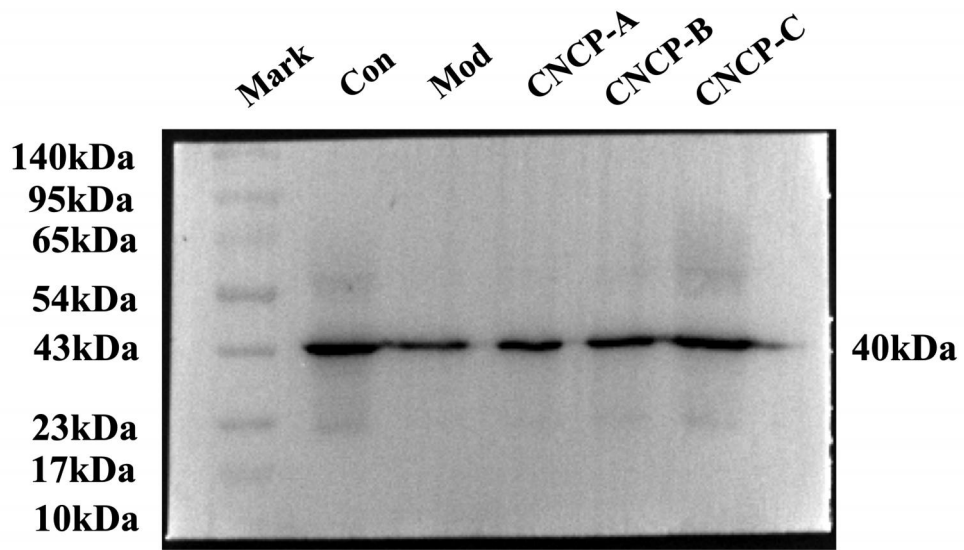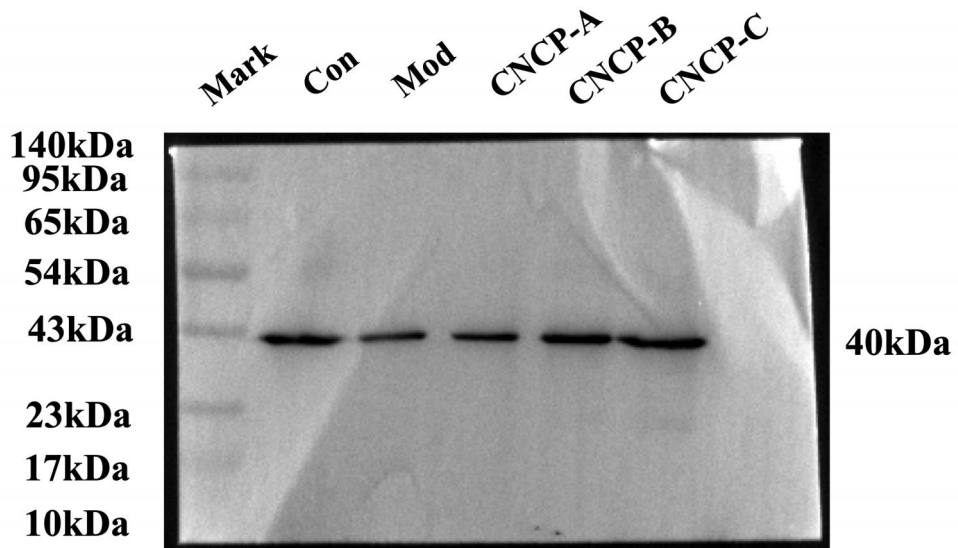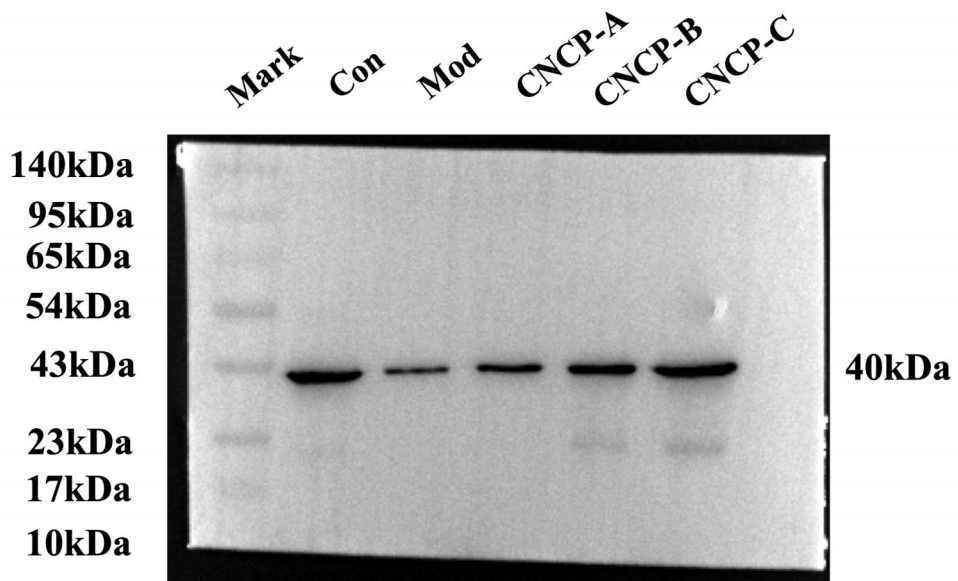

# Raf-1

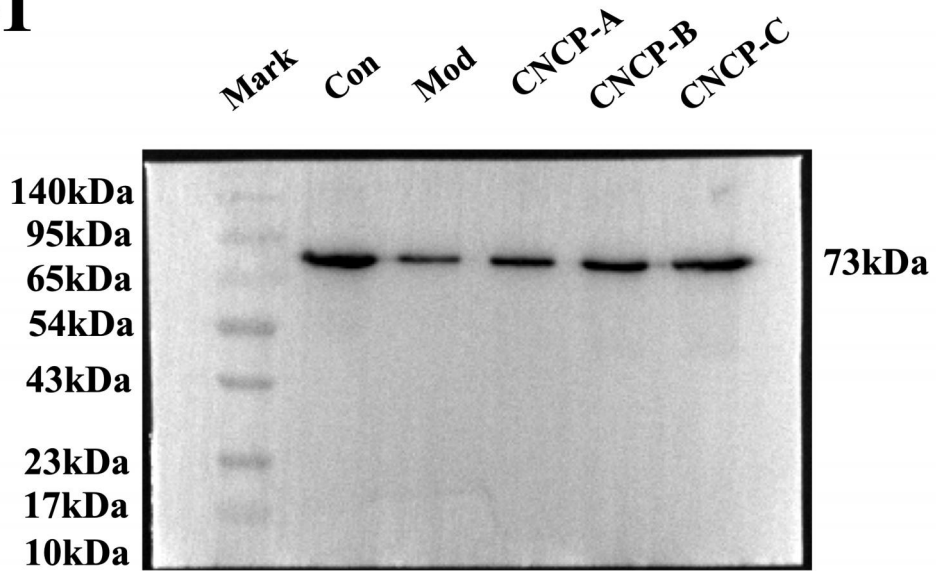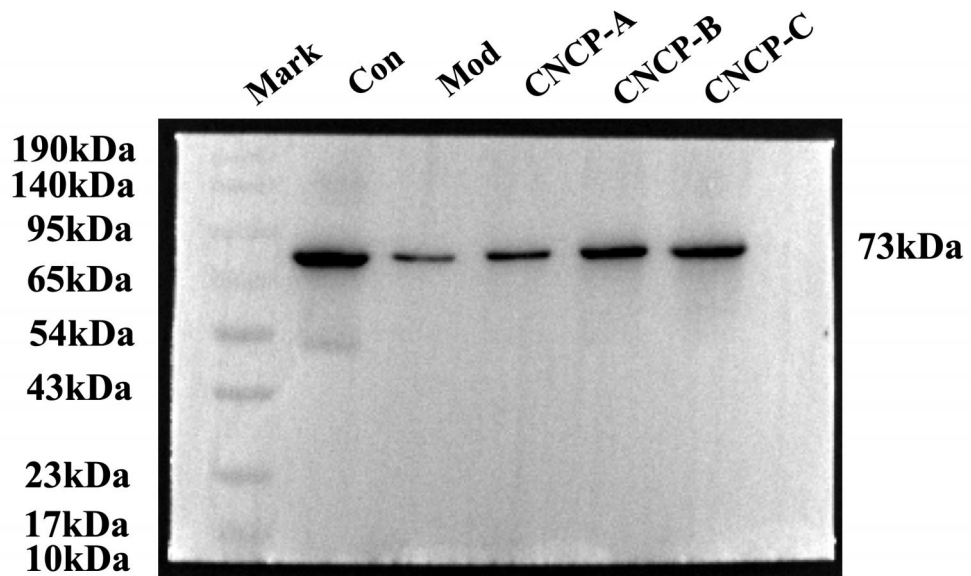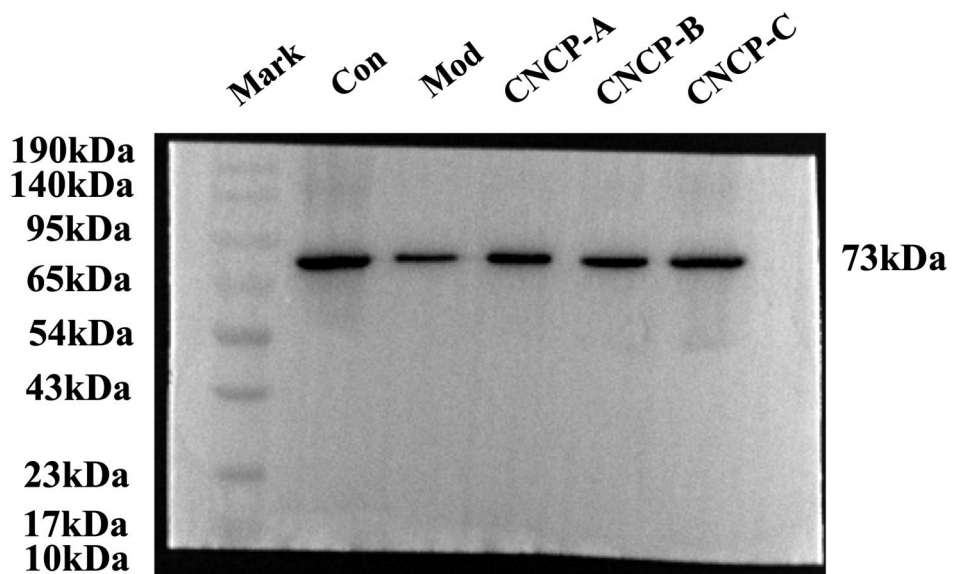

# p-ERK

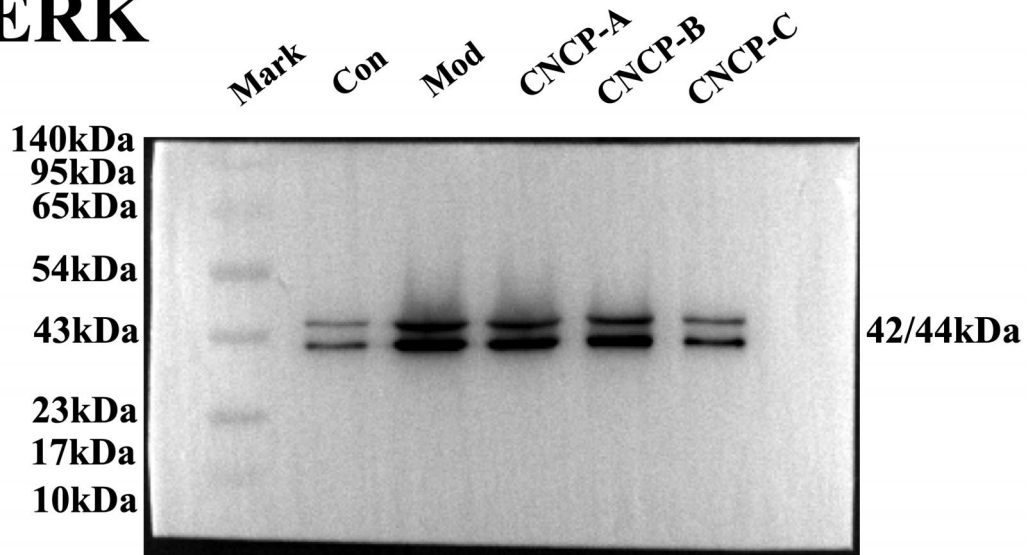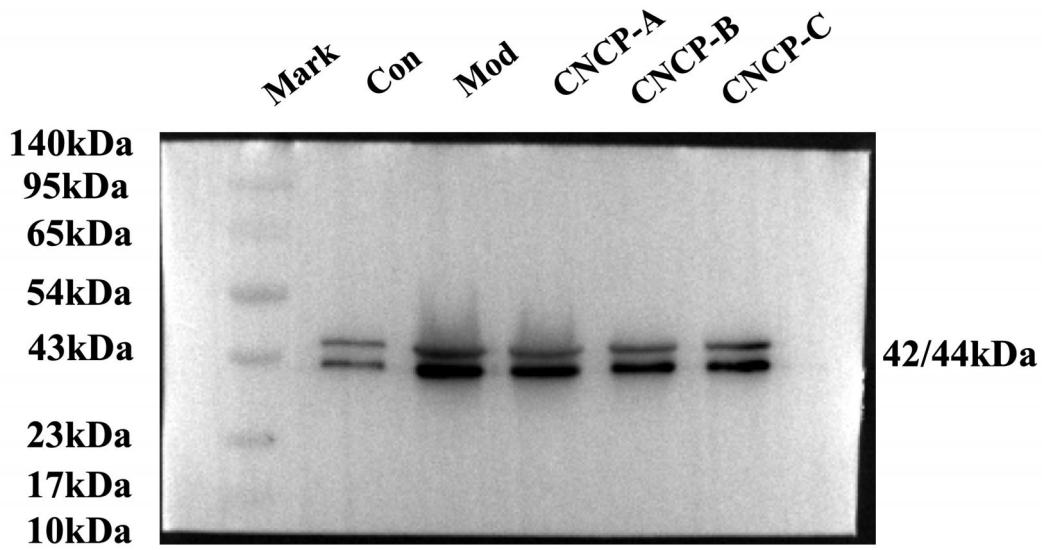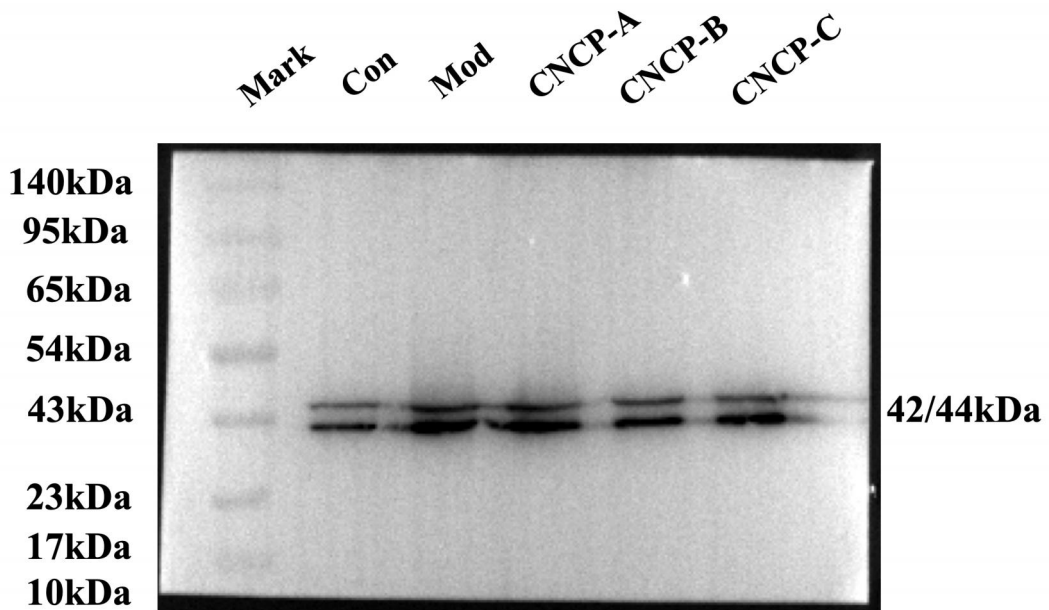

# ERK

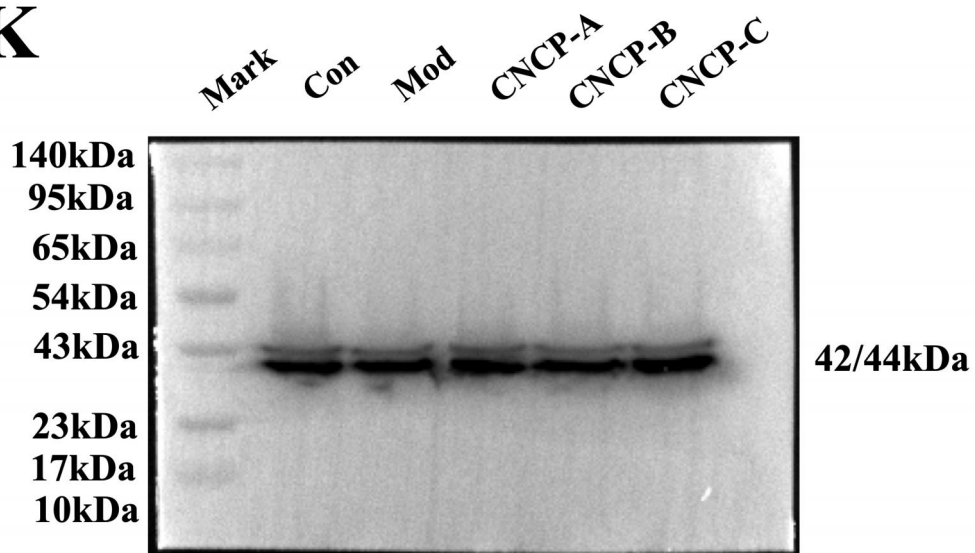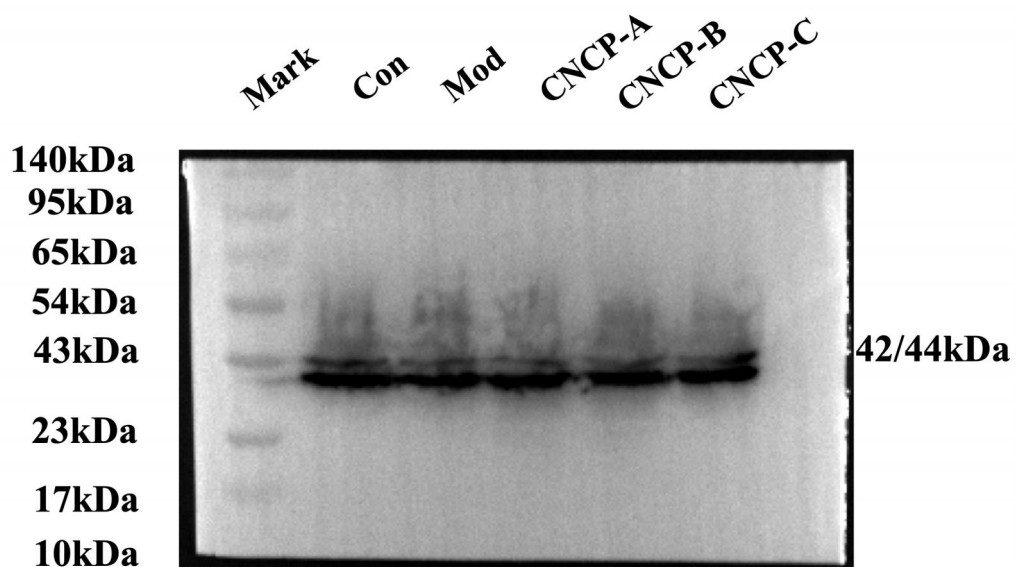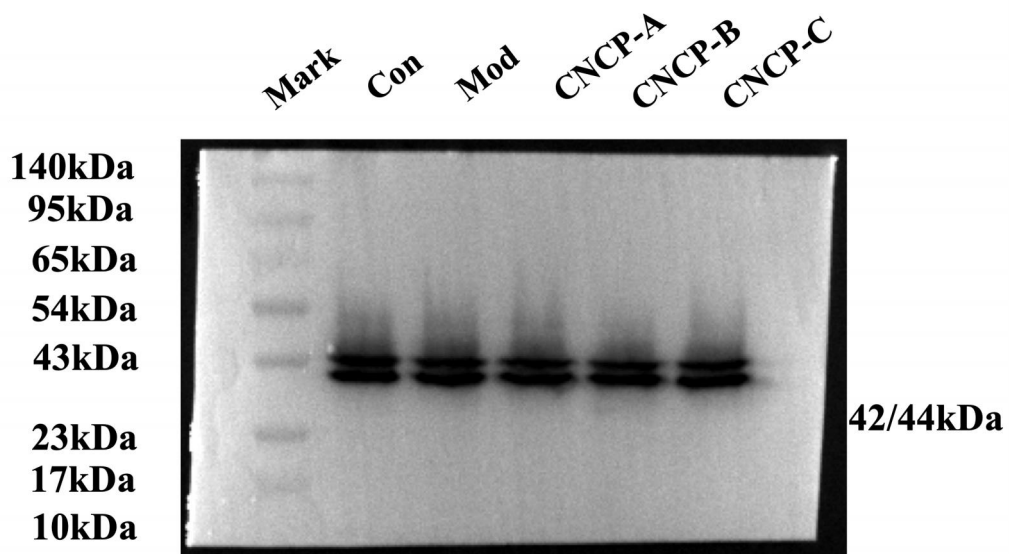

# GAPDH

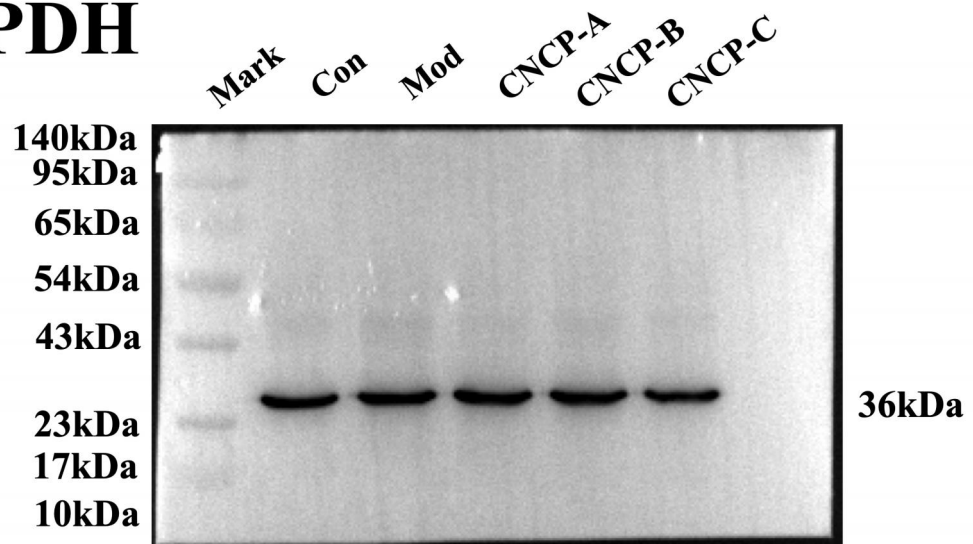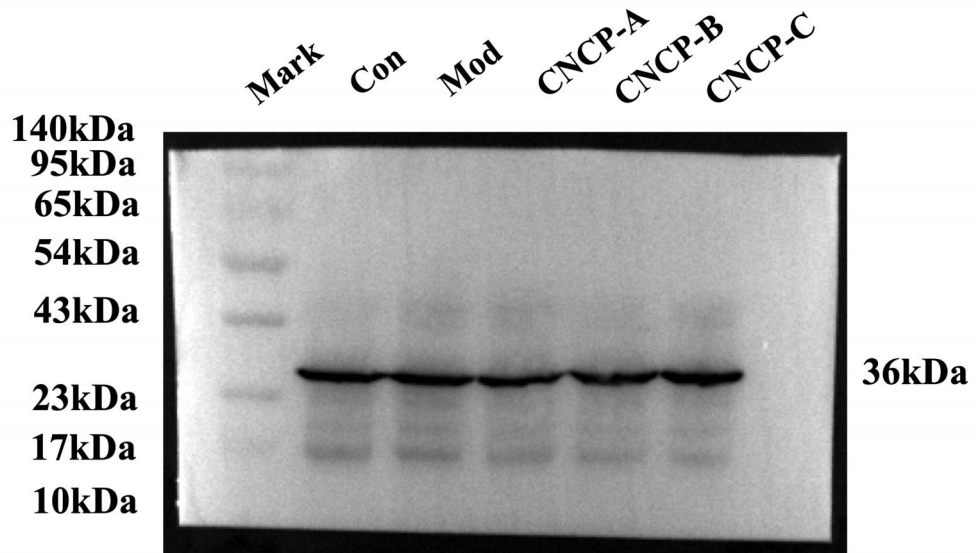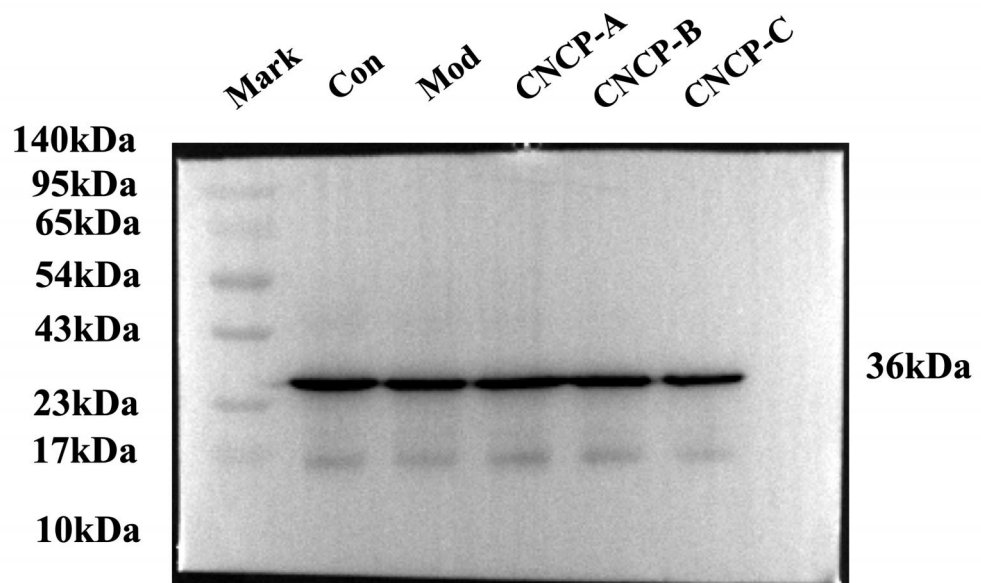

Supplement: d2fo03568e3.pdf [file d2fo03568e3.pdf]
